# Supplementary material
Source: publisher figshare collection journal article supplement (https://acs.figshare.com/ndownloader/files/5152261)
Supplement: Supplementary file 1 [file 5152261]

## Supporting Information

### **An *In Silico* Approach to Discovering Novel Inhibitors of Human Sirtuin Type 2**

Anu J. Tervo, Sergiy Kyrylenko, Päivi Niskanen, Antero Salminen, Jukka Leppänen,  
Tommi H. Nyrönen, Tomi Järvinen, Antti Poso

#### **Table of Contents:**

**Table 1.** Structures of the ten inactive candidate hit compounds tested *in vitro*.

**Figure 1.** Graphical representation of the first database search query.

**Figure 2.** Graphical representation of the second database search query.

**Figure 3.** GRID interaction energy fields of the phenolic and carboxy hydroxyl group probe (OH) within the putative SIRT2 active site.

**Figure 4.** GRID interaction energy fields of the tetrahedral cationic NH<sub>2</sub><sup>+</sup> group probe (NH<sub>2</sub><sup>+</sup>) within the putative SIRT2 active site.

**Figure 5.** GRID interaction energy fields of the hydrophobic DRY probe within the putative SIRT2 active site.

**Figure 6.** GRID interaction energy fields of the water probe within the putative SIRT2 active site.

**Table 1.** Structures of the ten candidate hit compounds found to be inactive *in vitro*. The compounds had a measured inhibitory activity value ( $IC_{50}$ ) over 1 mM for SIRT2.

| Compd | Structure                                                                           | Code <sup>a</sup> |
|-------|-------------------------------------------------------------------------------------|-------------------|
| 1     | 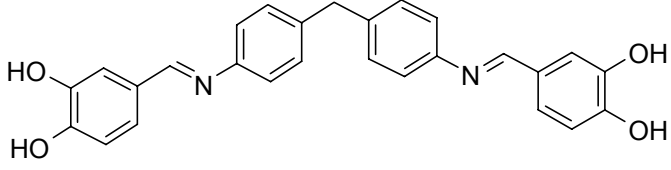  | CD01000           |
| 2     |    | HTS01146          |
| 3     |   | HTS06057          |
| 4     |  | JFD01599          |
| 5     |  | JFD02724          |
| 6     |  | JFD03169          |

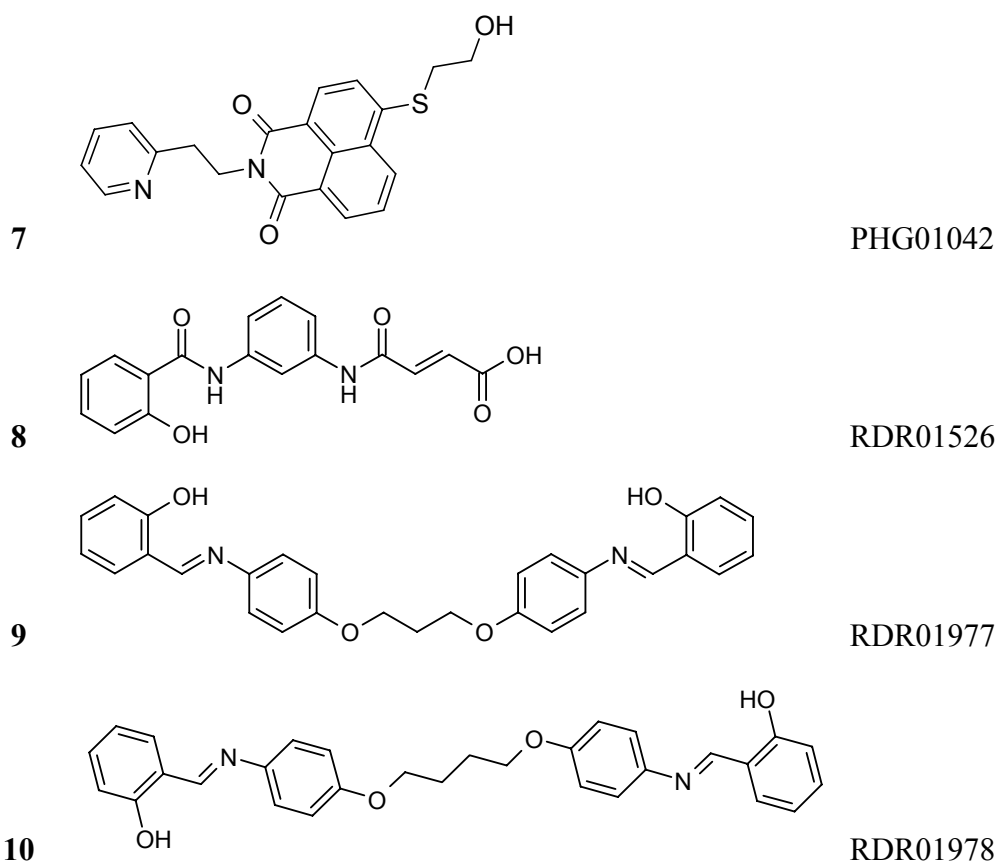

<sup>a</sup> Compound code numbers from Maybridge database.

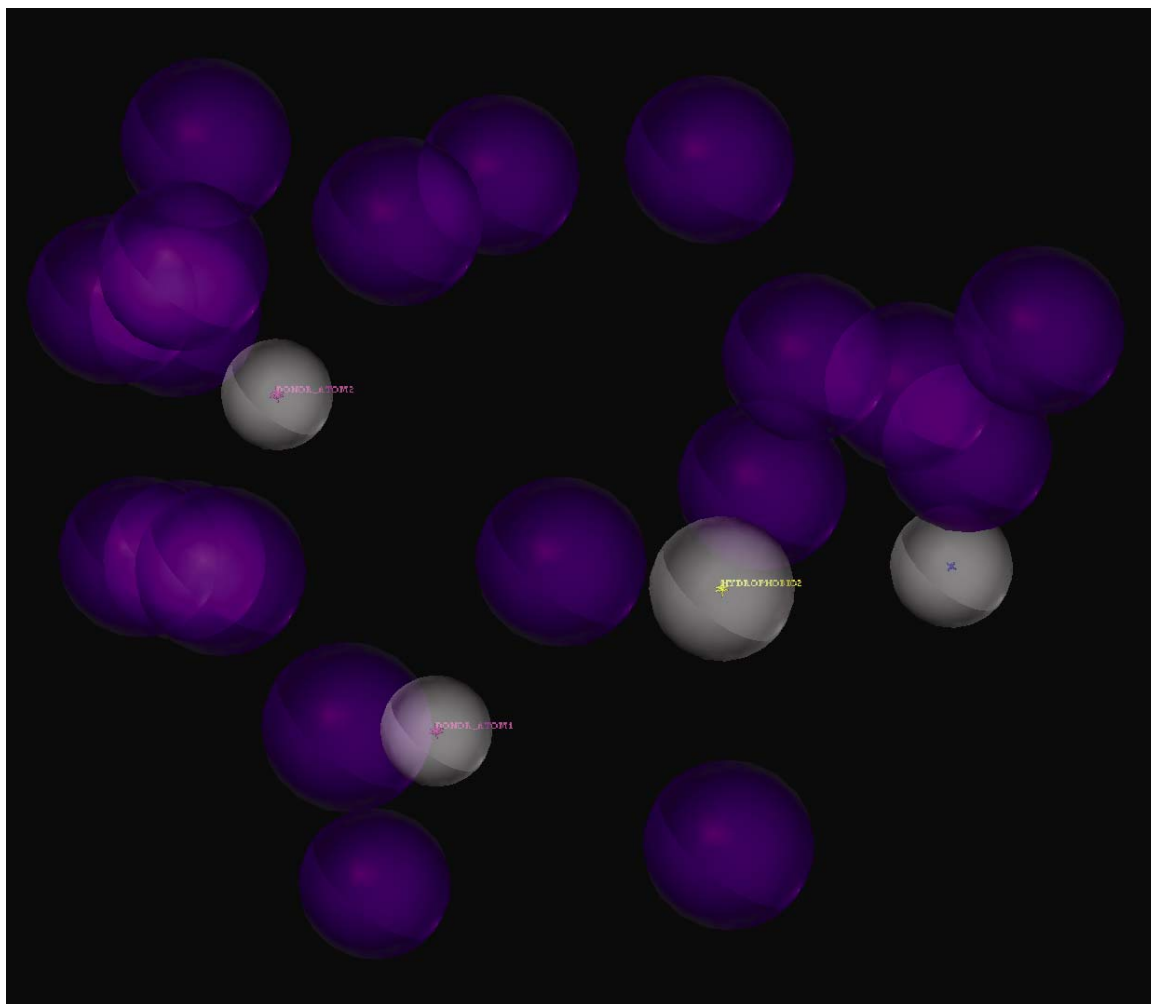

**Figure 1.** Graphical representation of the first database search query. Violet balls represent excluded volumes for outlining the putative SIRT2 active site. Gray balls with a magenta notation represent a donor atom at a tolerance of 1.0 Å. Candidate hit compounds were required to have at least one of these two donors. A gray ball with a yellow notation represents a hydrophobic feature at a tolerance of 1.3 Å. A gray ball without a notation represents an OH or SH group at a tolerance of 1.1 Å.

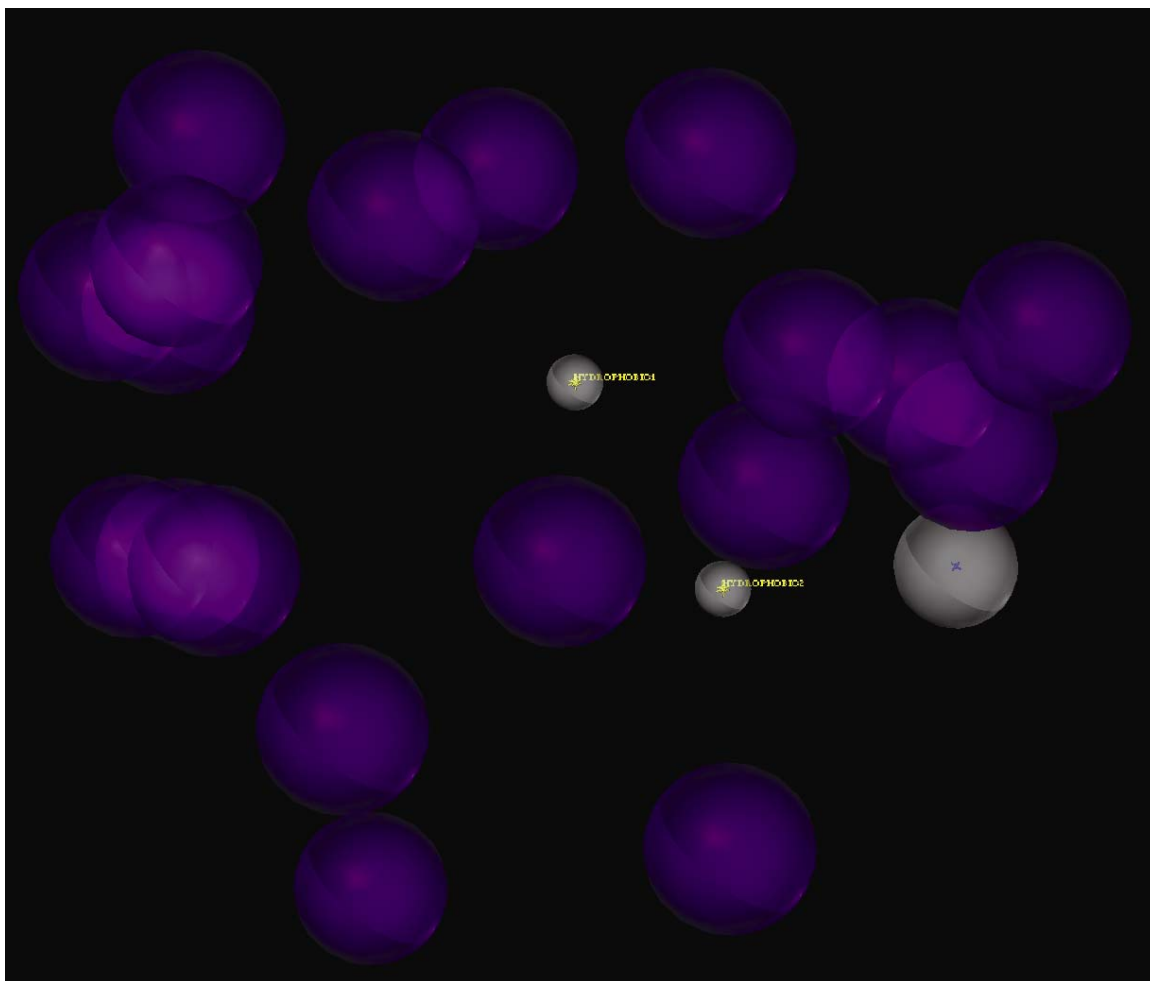

**Figure 2.** Graphical representation of the second database search query. Violet balls represent excluded volumes for outlining the putative SIRT2 active site. Gray balls with a yellow notation represent a hydrophobic feature at a tolerance of 0.5 Å. A gray ball without a notation represents an OH or SH group at a tolerance of 1.1 Å.

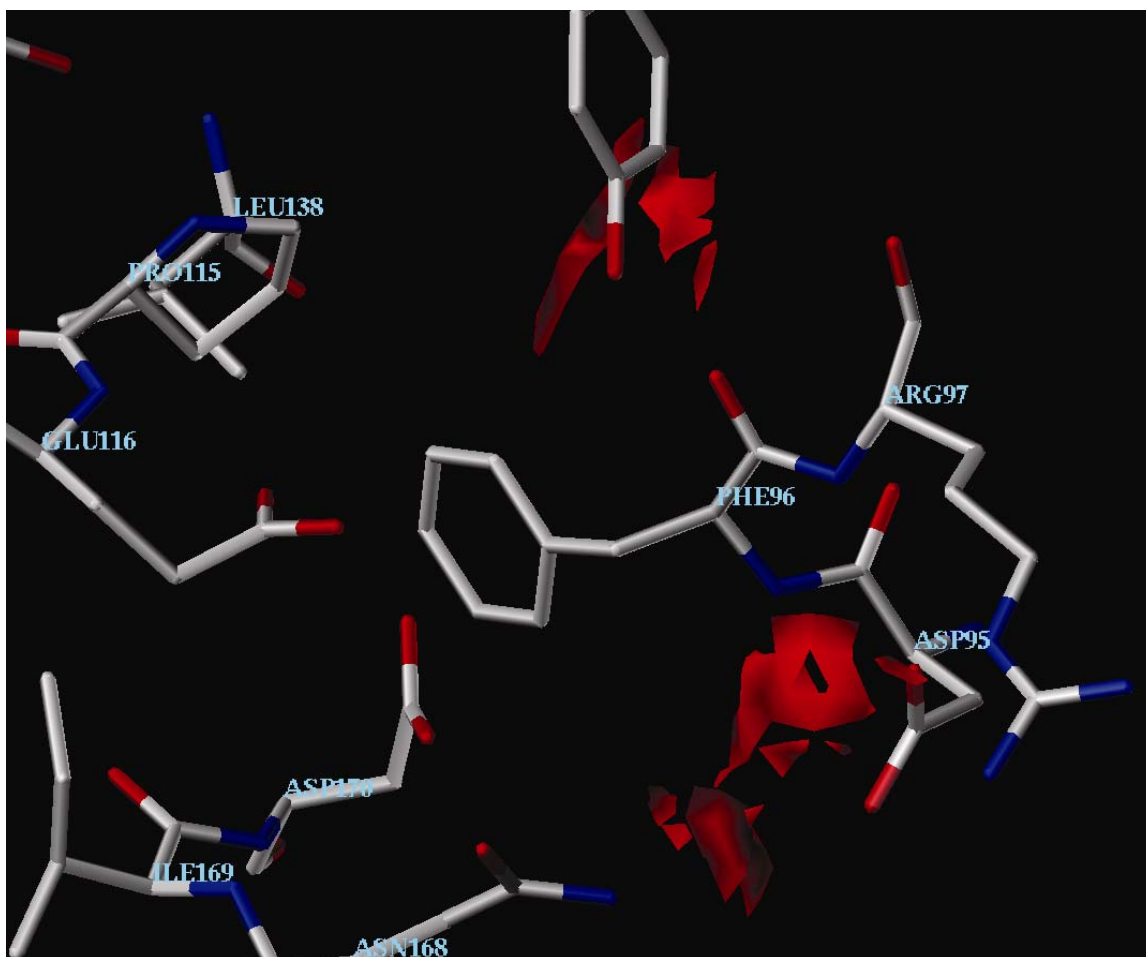

**Figure 3.** GRID interaction fields of the phenolic and carboxy hydroxyl group probe (OH) within the putative SIRT2 active site. The fields are visualized at an interaction energy level of  $-11.0$  kcal/mol. Hydrogens of the amino acids are omitted for clarity.

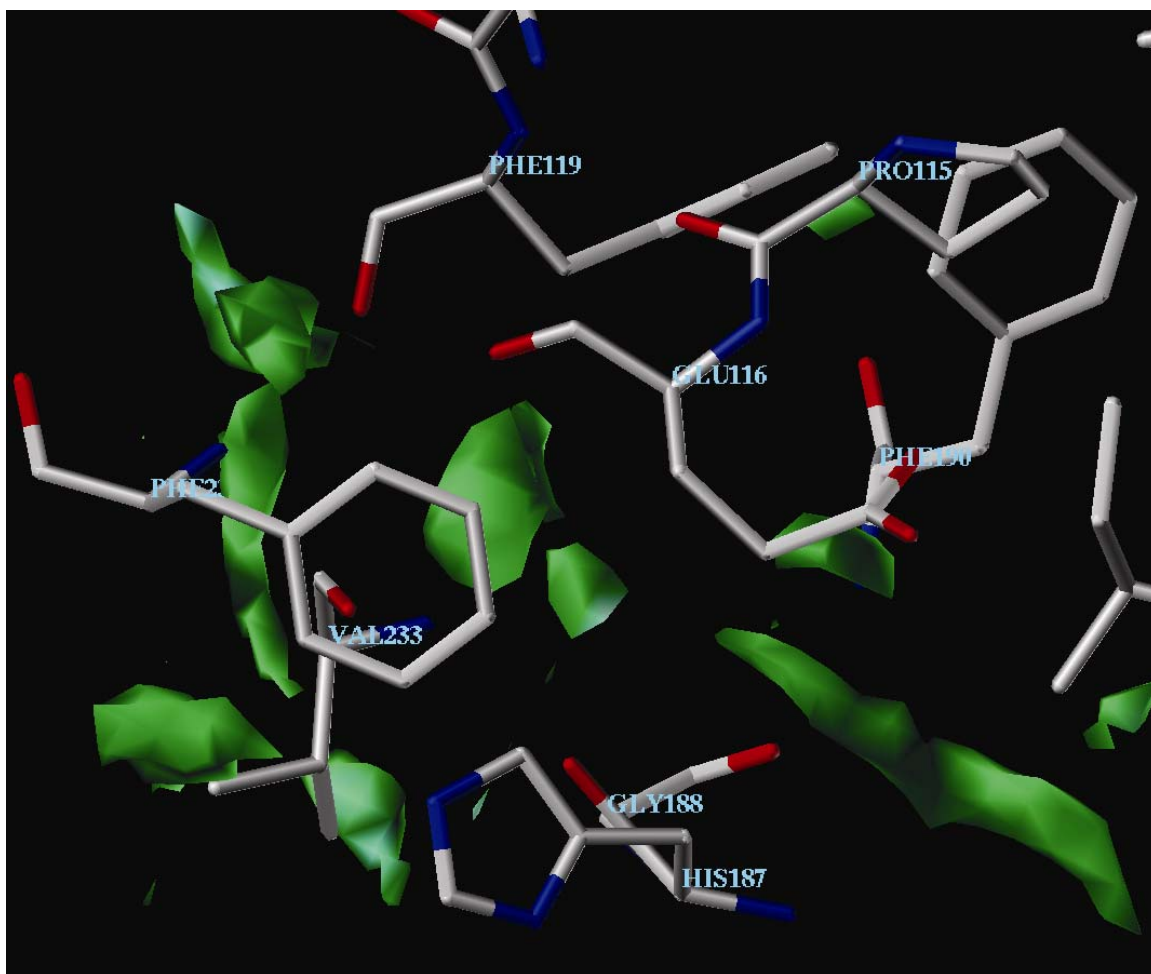

**Figure 4.** GRID interaction fields of the tetrahedral cationic  $\text{NH}_2^+$  group probe ( $\text{NH}_2^+$ ) within the putative SIRT2 active site. The fields are visualized at an interaction energy level of  $-13.0$  kcal/mol. Hydrogens of the amino acids are omitted for clarity.

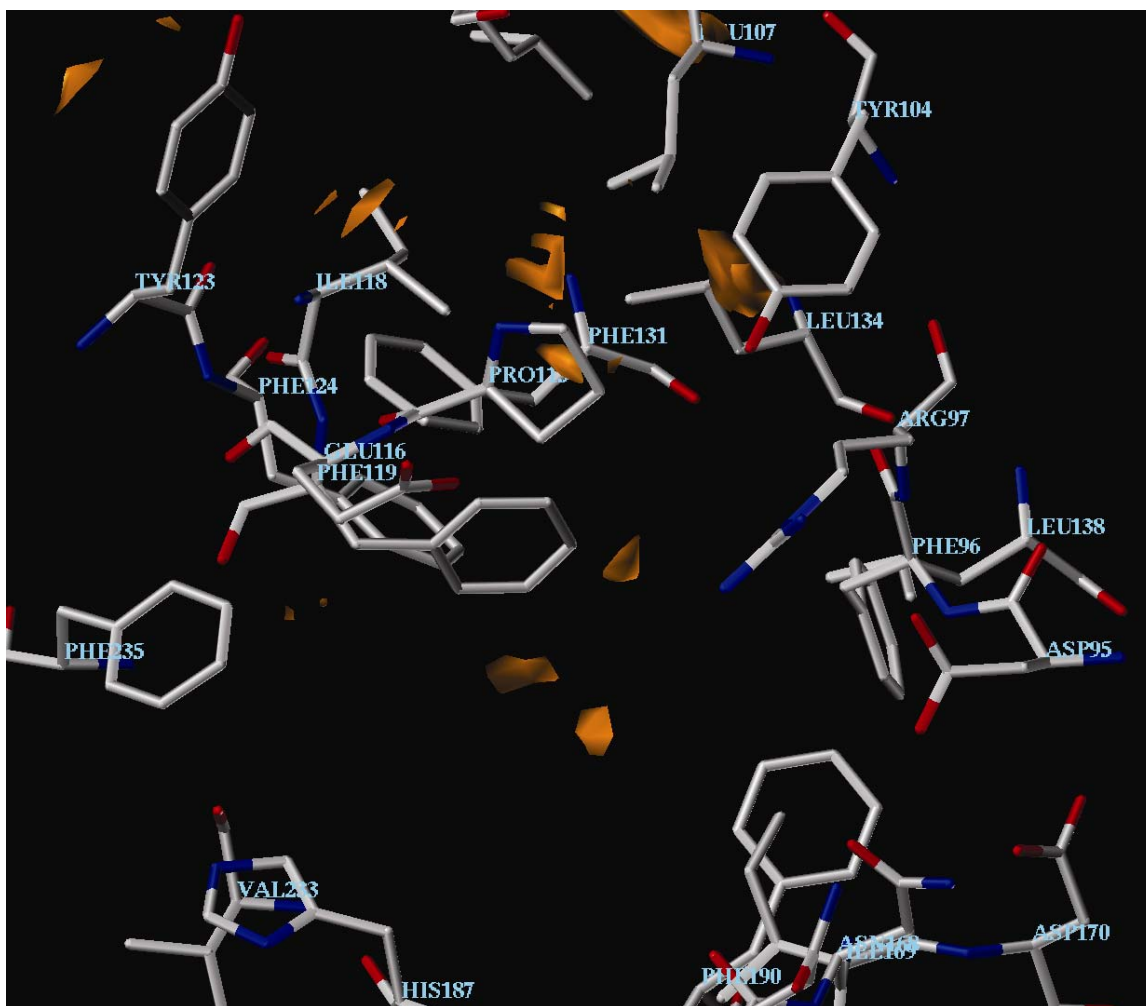

**Figure 5.** GRID interaction fields of the hydrophobic DRY probe within the putative SIRT2 active site. The fields are visualized at an interaction energy level of  $-1.5$  kcal/mol. Hydrogens of the amino acids are omitted for clarity.



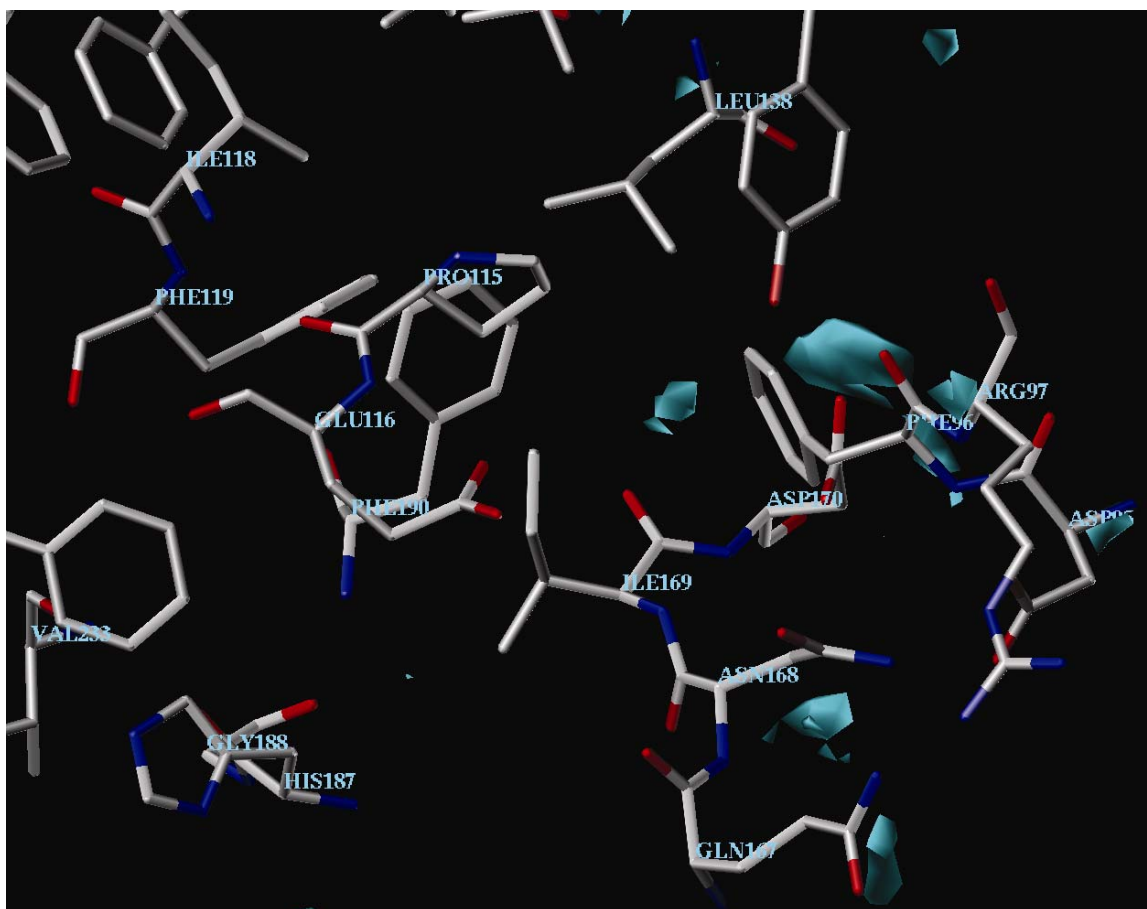

**Figure 6.** GRID interaction fields of the water probe within the putative SIRT2 active site. The fields are visualized at an interaction energy level of  $-16.0$  kcal/mol. Hydrogens of the amino acids are omitted for clarity.
